# Supplementary material for: A combined quantitative mass spectrometry and electron microscopy analysis of ribosomal 30S subunit assembly in E. coli
Source: eLife. 2014 Oct 14;3:e04491. doi: 10.7554/eLife.04491 (PMC4371863; doi:10.7554/eLife.04491)
Supplement: Supplemental file 1. — Proteomic data for sucrose gradient fractions from E. coli BW25113 and E. coli BW25113 ΔrimP. Gradient fractions are labeled as in Figure 1B and Figure 5A. Spectral counts for positively identified proteins are reported for each fraction. A brief gene description is given for each protein. DOI: http://dx.doi.org/10.7554/eLife.04491.019 [file elife04491s001.xlsx]

## Sheet: DGS_WT_MSMS.csv
	WT									∆rimP
Gene	Fraction 1	Fraction 2	Fraction 3	Fraction 4	Fraction 5	Gene description			Gene	Fraction 1	Fraction 2	Fraction 3	Fraction 4	Fraction 5	Gene description
total_spectrals	254	188	322	317	273				total_spectrals	310	286	330	323	227
aceA	1	0	0	0	1	Isocitrate lyase = [AceA]4			aceE	23	17	31	22	0	Pyruvate dehydrogenase E1P subunit
aceE	17	18	35	40	13	Pyruvate dehydrogenase E1P subunit			aceF	0	13	44	39	9	Pyruvate dehydrogenase E2 subunit
aceF	0	1	48	53	29	Pyruvate dehydrogenase E2 subunit			acpP	1	1	0	0	0	Acyl carrier protein
acpP	1	1	0	0	0	Acyl carrier protein			adhE	2	0	0	0	0	pyruvate-formate-lyase deactivase, 20-60 subunit ultrastructures
cspC	1	1	0	0	0	Cold shock protein RNA/DNA binding			ahpC	0	2	0	0	0	component of alkylhydroperoxide reducatse
cspE	1	1	0	1	0	Cold-shock protein, RNA/DNA binding			cspC	1	1	0	0	0	Cold shock protein RNA/DNA binding
cysJ	2	0	0	0	0	Sulfite reductase, flavoprotein subunit complex = [CysJ]8			cspE	2	2	0	0	0	Cold-shock protein, RNA/DNA binding
deaD	0	0	0	0	10	DEAD-box RNA helicase, 50S assembly			cysI	5	0	0	0	0	sulfite reductase component
fimA	4	4	4	4	4	Pili major type 1 subunit fimbrin			cysJ	8	0	0	0	0	Sulfite reductase, flavoprotein subunit complex = [CysJ]8
gapA	0	0	4	2	3	Glyceraldehyde 3-phosphate dehydrogenase = [GapA]4			cysK	1	0	0	0	0	component of cysteine synthase complex
glnA	9	0	0	0	0	Glutamine synethtase (glnA)12			deaD	0	0	11	14	26	DEAD-box RNA helicase, 50S assembly
groL	43	24	12	4	3	Subunit of GroEL			fepD	0	0	0	1	0	ferric enterobactin ABC transporter
groL2	12	5	0	0	0	GroEL			fimA	3	2	2	4	7	Pili major type 1 subunit fimbrin
groS	2	0	0	0	0	Subunit of GroES			gapA	5	3	2	2	2	Glyceraldehyde 3-phosphate dehydrogenase = [GapA]4
hfq	1	0	0	0	0	sRNA binding protein, RNA chaperone			glnA	15	0	0	0	0	Glutamine synethtase (glnA)12
hns	0	0	0	0	1	H-NS DNA-binding transcriptional dual regulator			gltA	2	0	0	0	0	citrate synthase = [GltA]6
hupA	1	4	0	0	0	Transcriptional dual-regulator HU-a			groL	42	24	4	1	0	Subunit of GroEL
hupB	0	1	0	1	1	Transcriptional dual-regulator HU-b			groL2	12	0	0	0	0	GroEL
infC	2	1	8	10	1	Initiation factor 3			groS	3	0	0	0	0	Subunit of GroES
lpdA	3	5	22	26	16	Pyruvate dehydrogenase, 2-oxoglutarte dehydrogenase and the glycine cleavage system subunit E3			hfq	1	0	0	0	0	sRNA binding protein, RNA chaperone
pgk	0	0	0	0	2	Phosphoglycerate kinase			hns	1	0	0	0	0	H-NS DNA-binding transcriptional dual regulator
proQ	2	3	1	2	2	RNA chaperone that binds dsRNA, helicase/annealing activity			hupA	4	3	0	0	0	Transcriptional dual-regulator HU-a
prs	4	0	0	0	0	Ribose-phsophate diphosphokinase			infA	1	0	0	0	0	IF-1
pyrB	1	0	0	0	0	Aspartate carbamoyltransferase subunit			infC	3	5	11	11	2	Initiation factor 3
rplA	1	0	0	0	10	Ribosomal protein L1			lpdA	11	8	19	14	4	Pyruvate dehydrogenase, 2-oxoglutarte dehydrogenase and the glycine cleavage system subunit E3
rplB	2	0	0	0	0	Ribosomal protein L2			pcnB	0	0	1	0	0	poly(A) polymerase I
rplC	2	0	0	1	3	Ribosomal protein L3			proQ	3	3	2	2	2	RNA chaperone that binds dsRNA, helicase/annealing activity
rplD	3	0	0	2	6	Ribosomal protein L4			prs	11	8	0	0	2	Ribose-phsophate diphosphokinase
rplE	2	0	0	0	2	Ribosomal protein L5			pssA	0	0	2	1	0	phosphatidylserine synthase
rplF	2	0	0	0	0	Ribosomal protein L6			rplA	0	0	0	6	8	Ribosomal protein L1
rplI	7	4	0	0	0	Ribosomal protein L9			rplC	0	0	0	0	7	Ribosomal protein L3
rplK	2	2	0	2	3	Ribosomal protein L11			rplD	0	2	1	5	5	Ribosomal protein L4
rplL	1	0	0	0	0	Ribosomal protein L7/L12			rplE	0	0	0	0	4	Ribosomal protein L5
rplO	2	0	0	1	3	Ribosomal protein L15			rplI	0	0	0	0	1	Ribosomal protein L9
rplQ	0	0	0	0	1	Ribosomal protein L17			rplK	3	4	0	3	2	Ribosomal protein L11
rplT	2	0	0	2	6	Ribosomal protein L20			rplO	0	0	0	0	1	Ribosomal protein L15
rplU	1	0	0	0	0	Ribosomal protein L21			rplT	0	0	0	4	3	Ribosomal protein L20
rplX	2	0	0	0	7	Ribosomal protein L24			rplX	0	0	0	0	6	Ribosomal protein L24
rpmB	2	1	2	2	2	Ribosomal protein L28			rpmB	1	2	2	2	2	Ribosomal protein L28
rpmC	0	0	0	0	2	Ribosomal protein L29			rpmC	0	2	1	3	5	Ribosomal protein L29
rpmD	1	0	0	0	0	Ribosomal protein L30			rpmD	1	0	0	0	0	Ribosomal protein L30
rpmE	0	0	0	0	1	Ribosomal protein L31			rpmE	0	0	0	0	3	Ribosomal protein L31
rpmF	2	0	0	0	0	Ribosomal protein L32			rpmG	0	2	0	0	0	L33
rpoA	3	0	0	0	2	RNA pol a subunit			rpoA	6	5	0	1	1	RNA pol a subunit
rpoC	2	0	0	0	0	RNA pol B' subunit			rpoC	12	5	0	3	3	RNA pol B' subunit
rpsA	14	2	23	21	11	Ribosomal protein S1			rpsA	6	6	17	19	10	Ribosomal protein S1
rpsB	0	0	14	11	5	Ribosomal protein S2			rpsB	0	0	15	10	3	Ribosomal protein S2
rpsC	0	0	7	13	10	Ribosomal protein S3			rpsC	0	4	15	14	7	Ribosomal protein S3
rpsD	8	8	17	12	9	Ribosomal protein S4			rpsD	6	14	15	16	11	Ribosomal protein S4
rpsE	3	9	12	11	10	Ribosomal protein S5			rpsE	4	10	12	14	11	Ribosomal protein S5
rpsF	3	3	5	8	3	Ribosomal protein S6			rpsF	6	2	11	5	6	Ribosomal protein S6
rpsG	0	2	10	11	8	Ribosomal protein S7			rpsG	0	7	14	12	5	Ribosomal protein S7
rpsH	1	2	6	6	6	Ribosomal protein S8			rpsH	2	6	5	5	3	Ribosomal protein S8
rpsI	0	3	8	7	8	Ribosomal protein S9			rpsI	0	6	6	8	2	Ribosomal protein S9
rpsJ	1	4	7	6	6	Ribosomal protein S10			rpsJ	3	6	7	6	4	Ribosomal protein S10
rpsK	0	2	6	6	4	Ribosomal protein S11			rpsK	0	4	5	6	5	Ribosomal protein S11
rpsL	1	3	6	3	3	Ribosomal protein S12			rpsL	0	2	6	4	0	Ribosomal protein S12
rpsM	2	6	13	10	9	Ribosomal protein S13			rpsM	2	14	12	13	12	Ribosomal protein S13
rpsN	0	0	4	2	2	Ribosomal protein S14			rpsN	0	2	5	4	3	Ribosomal protein S14
rpsO	0	1	2	0	2	Ribosomal protein S15			rpsO	0	2	4	0	0	Ribosomal protein S15
rpsP	0	0	4	4	2	Ribosomal protein S16			rpsP	1	7	5	8	6	Ribosomal protein S16
rpsQ	0	0	0	1	0	Ribosomal protein S17			rpsR	3	4	8	7	4	Ribosomal protein S18
rpsR	2	3	6	5	6	Ribosomal protein S18			rpsS	0	1	3	2	0	Ribosomal protein S19
rpsS	0	0	3	2	0	Ribosomal protein S19			rpsT	3	6	4	7	5	Ribosomal protein S20
rpsT	2	3	6	5	7	Ribosomal protein S20			rpsU	0	0	3	3	2	Ribosomal protein S21
rpsU	0	0	3	4	3	Ribosomal protein S21			srmB	0	0	0	4	3	DEAD-box RNA helicase, 50S assembly
sra	0	1	0	0	0	Stationary-phase-induced ribosome associated protein			sucA	34	27	7	3	0	2-oxoglutarate dehydrogenase subunit E1
srmB	0	0	0	1	10	DEAD-box RNA helicase, 50S assembly			sucB	25	18	7	0	0	2-oxoglutarate dehydrogenase dihydrolipoyltranssuccinylase subunit
sucA	33	25	7	0	1	2-oxoglutarate dehydrogenase subunit E1			tig	9	3	0	0	0	Trigger factor protein chaperone
sucB	21	21	7	2	2	2-oxoglutarate dehydrogenase dihydrolipoyltranssuccinylase subunit			tpx	2	1	0	0	0	lipid hydroperoxide perxoidase = [Tpx]2
tufA	13	12	9	12	9	Elogation factor Tu			tufA	21	18	11	13	13	Elogation factor Tu
yhbH	3	1	0	0	0	Hibernation promoting factor binds to 100S ribosome dimers			ydaY	0	0	0	0	2	prophage gene
yhbY	0	0	0	0	1	Ribosome assembly co-factor			yhbY	0	0	0	1	2	Ribosome assembly co-factor
yibL	0	0	0	0	2	Conserved protein found associated with 50S subunit			yibL	0	0	0	0	2	Conserved protein found associated with 50S subunit
									ynjE	0	1	0	0	0	molybdopterin synthase sulfurtransferase
